# Supplementary material for: Experiences of new tenure-track PhD-prepared faculty: a scoping review
Source: publisher site journal article supplement (doi:10.1515/ijnes-2022-0025), 2023-01-01
Supplement: Supplementary file 1 [file j_ijnes-2022-0025_suppl.docx]

**Abstract**

The purpose of this scoping review was to assess the state of the literature concerning the experiences of new PhD-prepared tenure-track faculty, with a keen interest in nursing faculty. Effective recruitment and retention strategies for new nursing academic faculty need to be found and implemented. A literature review based on Arksey and O’Malley’s five-stage framework for scoping reviews was undertaken. Using the PRISMA protocol, a systematic literature search was conducted in seven databases of studies published in English. Based upon inclusion criteria and relevance, 13 studies out of 90 papers were included in this study. Themes identified from the studies were transitioning to academia, developing a research program, balancing work and life, and perceived inequity. The research was predominately American and Canadian based. Several gaps in the literature were identified. Further research is critical to make recommendations to key stakeholders for recruitment and retention strategies.

***Keywords*:** PhD-prepared, tenure-track, nursing faculty, faculty recruitment, faculty retention
